# Supplementary material for: De novo Transcriptome Sequencing of MeJA-Induced Taraxacum koksaghyz Rodin to Identify Genes Related to Rubber Formation
Source: PubMed Central journal article supplement (PMC5691164; doi:10.1038/s41598-017-14890-z), 2017-11-16
Supplement: 41598_2017_14890_MOESM1_ESM.pdf [file 41598_2017_14890_MOESM1_ESM.pdf]

***De novo* Transcriptome Sequencing of MeJA-Induced *Taraxacum koksaghyz* Rodin to Identify Genes Related to Rubber Formation**

**XinWen Cao<sup>1</sup>, Jie Yan<sup>1\*+</sup>, JiLian Lei<sup>1</sup>, Jin Li<sup>1</sup>, JianBo Zhu<sup>1</sup>, HuiYan Zhang<sup>1</sup>**

<sup>1</sup> College of Life Science, University of Shi He Zi, Xin Jiang, 832000, China

<sup>+</sup> Co-first authors.

<sup>\*</sup> Corresponding author

**Authors:**

| <b>Name</b>  | <b>Email</b>          |
|--------------|-----------------------|
| XinWen Cao   | 981319376@qq.com      |
| JiLiang Lei  | raymond8350@yahoo.com |
| Jin Li       | 1530804952@qq.com     |
| JianBo Zhu   | 274831213@qq.com      |
| HuiYan Zhang | spongebobyz@163.com   |

**\*Corresponding author:**

**Dr. Jie Yan**

Department of Life Science,  
College of Life Science of Shi He Zi University  
Shi He Zi, Xin Jiang, 832000, China  
Phone (or Mobile) No.: +8613677564159  
Email: 1653842328 @qq.com

## Supplementary Figures:

**Supplementary Fig S1.** The species classification of the NR annotation result of the transcriptome

**Supplementary Fig S2.** E-value distribution of NR database annotation of the transcriptome

**Supplementary Fig S3.** Similarity distribution of NR database annotation of the transcriptome

**Supplementary Fig S4.** Gene function classification of GO database of the transcriptome from three categories of Biological Process, Cellular Component and Molecular Function. The X-axis showed the concrete terms of three categories and the Y-axis showed the number of genes in different terms.

**Supplementary Fig S5.** KOG function classification of the transcriptome from 26 terms. The Y-axis showed the percentage genes accounted for.

**Supplementary Fig S6.** DEGs statistics between 0 h and 6h-treated lines (A) and between 0 h and 24 h-treated lines (B). The color red means genes up-regulated and the green means genes down-regulated and the color blue means the expression level of genes showed no obvious change.

**Supplementary Fig S7. Enriched terms of gene ontology for the DEGs between the 0 h and 6 h-treated line (A) and between the 0 h and 24 h-treated line (B).**

Distribution of differential expressed genes in 0 h vs 6h-treated line and 0 h vs 24h-treated line from the categories of biological process (BP) and molecular function (MF); The color red means up-regulated and the blue means down-regulated terms. The Y-axis showed the number of genes for different terms.

**Supplementary Fig S8A. The identification of *ERF* transgenic TKS seedlings by genomic pcr.** M means DNA Marker III; 1 means the positive control and the 2 means the WT, 3-13 means different transgenic seedlings.

**Supplementary Fig S8B. The identification of *DREB* transgenic TKS seedlings by genomic pcr.** M means DNA Marker III and number 1-8 means different transgenic seedlings, 9 means the positive control.

**Supplementary Table:**

**Supplementary Table S1.** Primers of 12 selected genes designed by Primer Premier 5.0 used for qPCR analysis

### Species classification

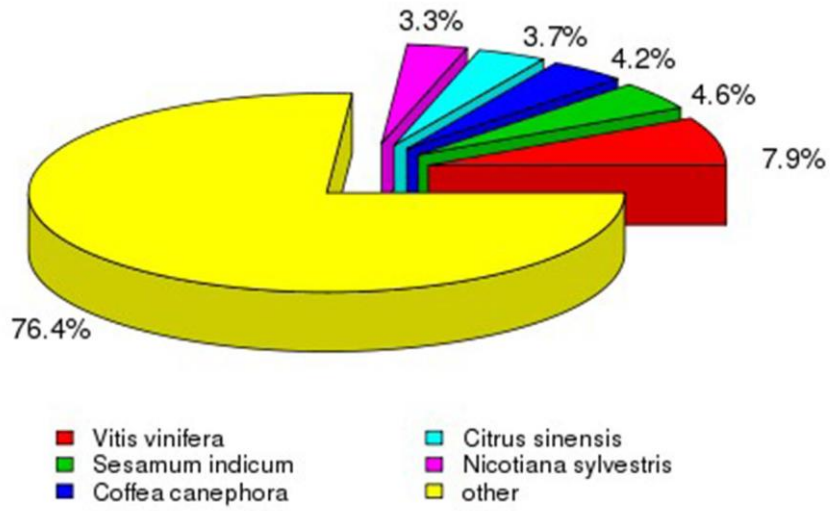

**Supplementary Fig S1.** The species classification of the NR annotation result of the transcriptome

### E-value Distribution

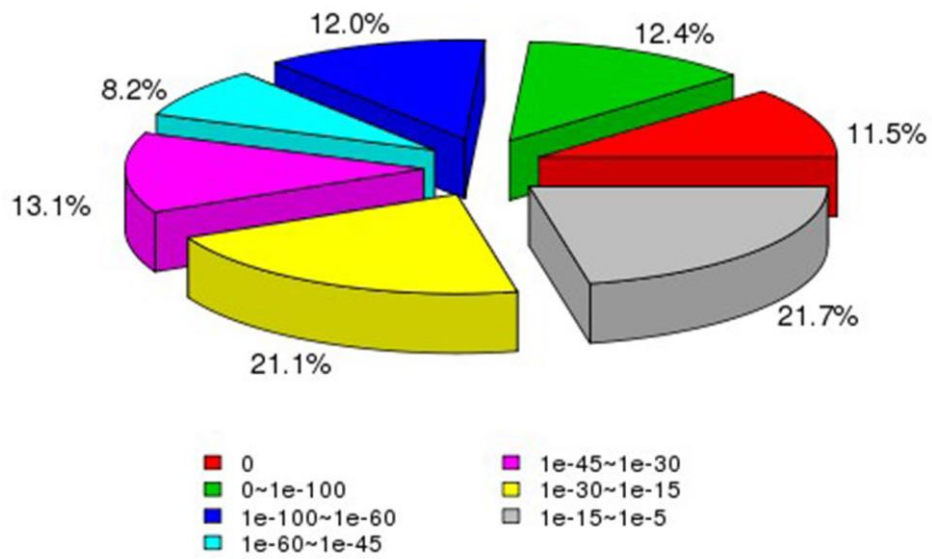

**Supplementary Fig S2.** E-value distribution of NR database annotation of the transcriptome

### Similarity Distribution

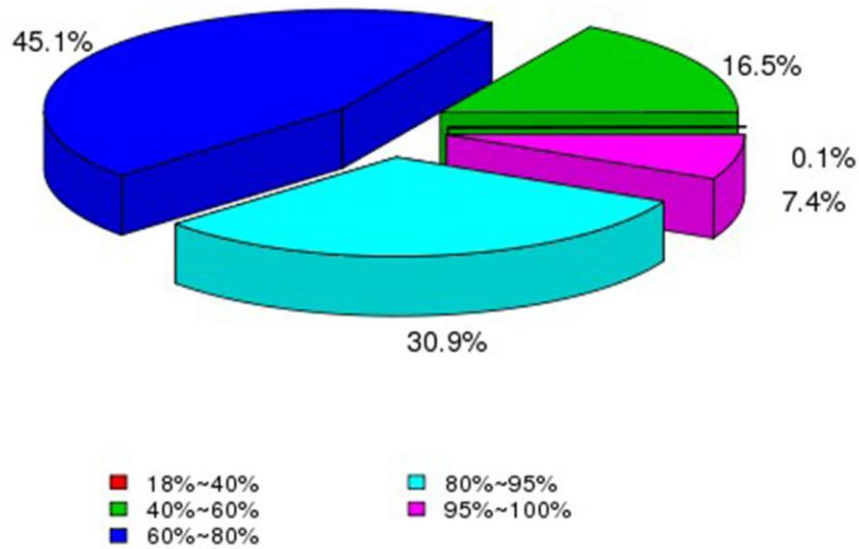

**Supplementary Fig S3.** Similarity distribution of NR database annotation of the transcriptome

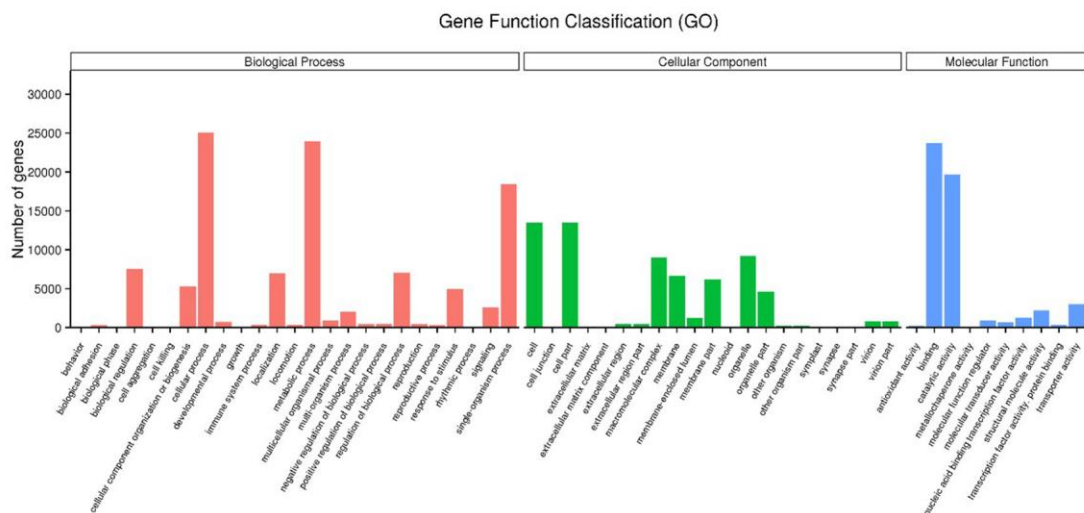

**Supplementary Fig S4.** Gene function classification of GO database of the transcriptome from three categories of Biological Process, Cellular Component and Molecular Function. The X-axis showed the concrete terms of three categories and the Y-axis showed the number of genes in different terms.

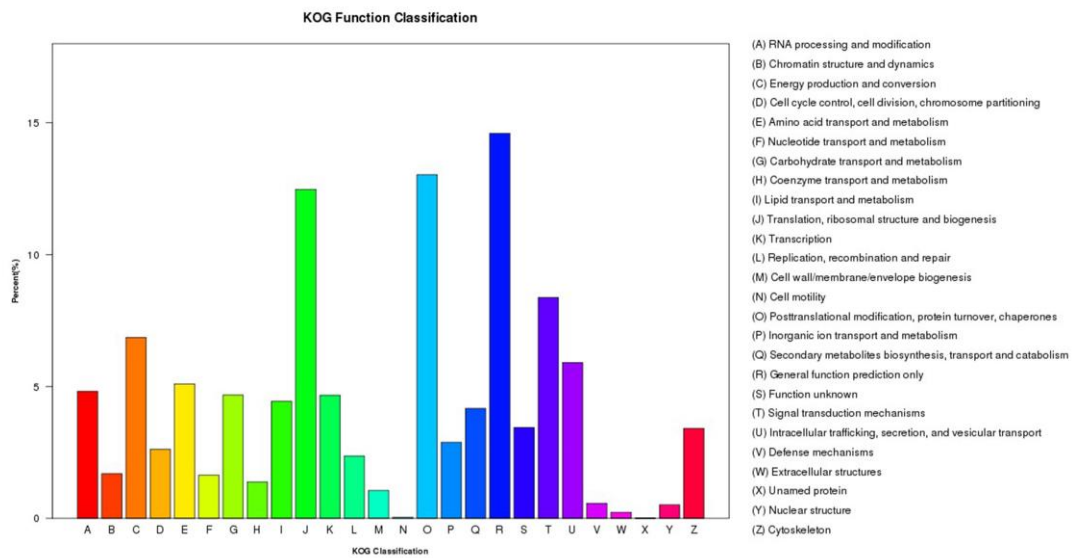

**Supplementary Fig S5.** KOG function classification of the transcriptome from 26 terms. The Y-axis showed the percentage genes accounted for.

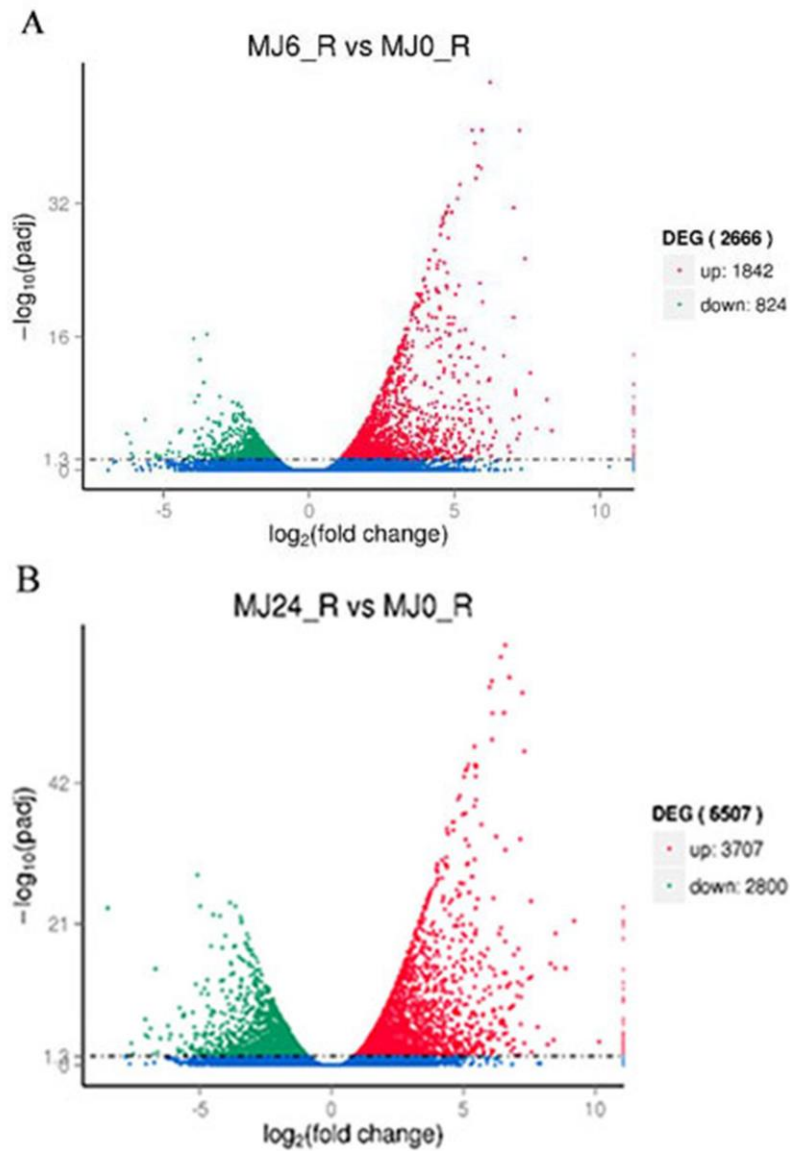

**Supplementary Fig S6.** DEGs statistics between 0 h and 6h-treated lines (A) and between 0 h and 24 h-treated lines (B). The color red means genes up-regulated and the green means genes down-regulated and the color blue means the expression level of genes showed no obvious change.



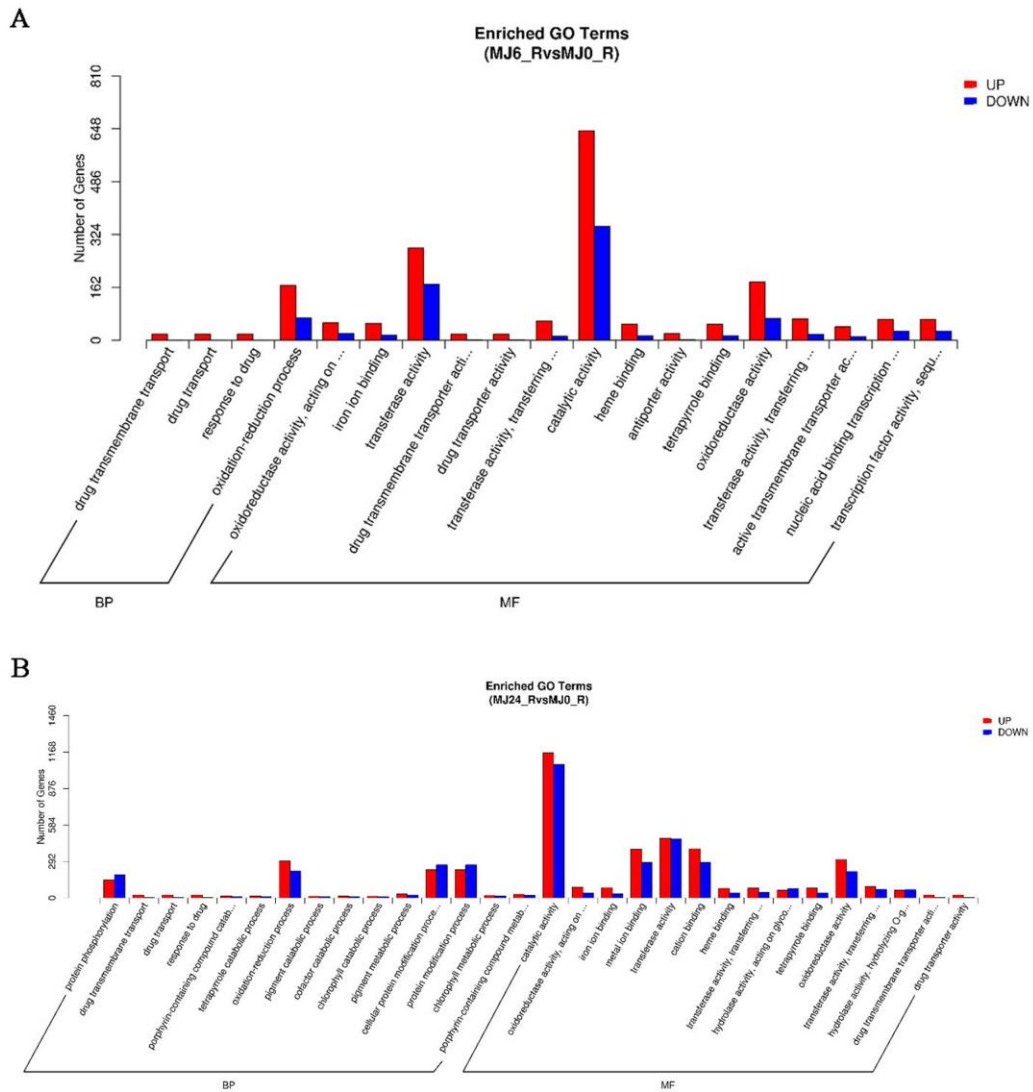

**Supplementary Fig S7. Enriched terms of gene ontology for the DEGs between the 0 h and 6 h-treated line (A) and between the 0 h and 24 h-treated line (B).**

Distribution of differential expressed genes in 0 h vs 6h-treated line and 0 h vs 24h-treated line from the categories of biological process (BP) and molecular function (MF); The color red means up-regulated and the blue means down-regulated terms. The Y-axis showed the number of genes for different terms.

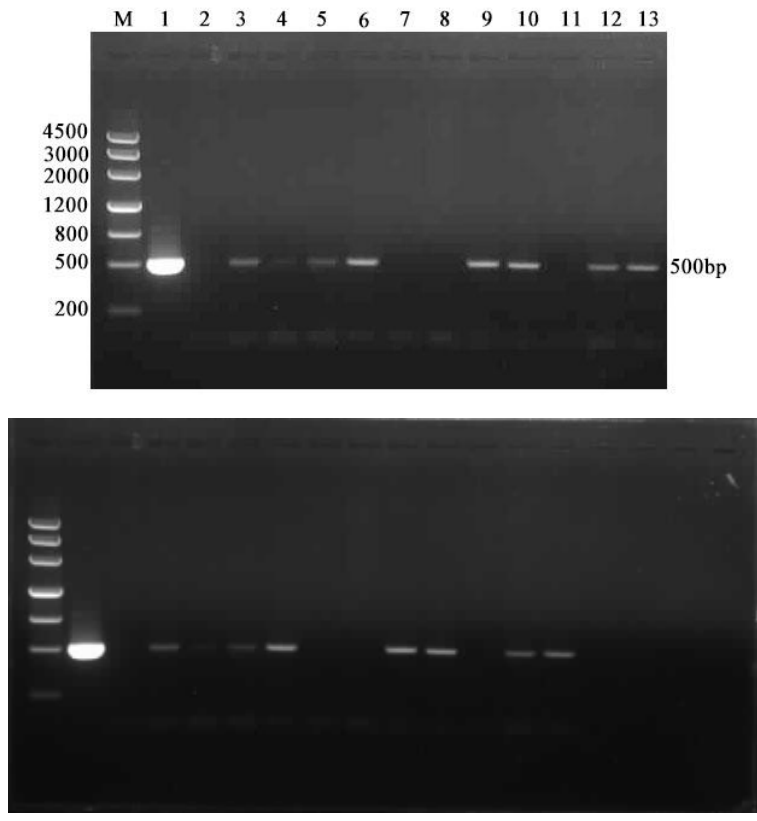

(The original gel image)

**Supplementary Fig S8A. The identification of *ERF* transgenic TKS seedlings by genomic pcr.** M means DNA Mark III; 1 means the positive control and the 2 means the WT, 3-13 means different transgenic seedlings. The gel image acquisition was achieved by Gel Doc XR System (Bio-rad: Intas Gel Hood) and processed with Photoshop (label and clip).

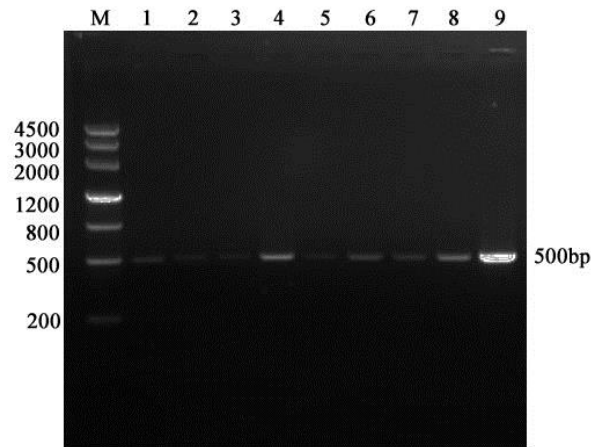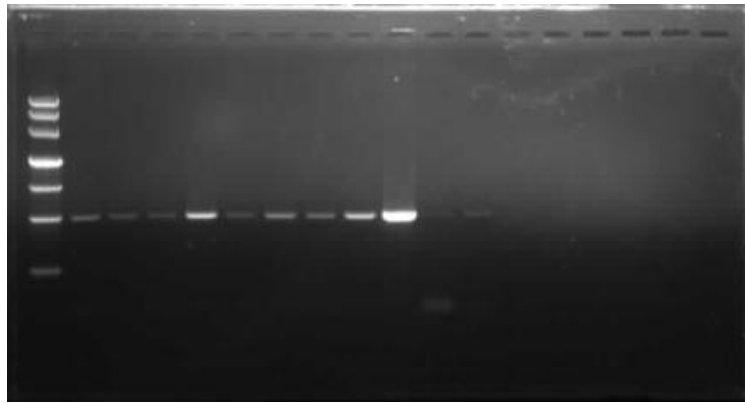

(The original gel image)

**Supplementary Fig S8B. The identification of *DREB* transgenic TKS seedlings by Genomic PCR.** M means DNA Marker III and number 1-8 means different transgenic seedlings, 9 means the positive control. The gel image acquisition was achieved by Gel Doc XR System (Bio-rad: Intas Gel Hood) and processed with Photoshop (label and clip).

**Supplementary Table S1.** Primers of 12 selected genes designed by Primer Premier 5.0 used for qPCR analysis

**Primers used for quantitative PCR analysis**

| <b>Gene</b> | <b>Unigene ID</b> | <b>Forward Primer</b>     | <b>Reverse Promer</b>     |
|-------------|-------------------|---------------------------|---------------------------|
| AOS         | c39329_g1         | CTACGGCGAAGGTAAGGTGAC     | CTGGAACCCGAATAACATCTCAC   |
| AOC         | c44998_g3         | ACGGGCAGATAGCAGTCCAG      | ACGGAGGAACAGGGGTGACT      |
| LOX         | c53508_g1         | ATTCTCCGCCAAGCGACCAC      | CAACGCCGCCAACACCTA        |
| OPR         | c49640_g1         | CAGACAAAGTCGGCGTCAGAAT    | TCAACTCTGCCACTTCCTCTTCA   |
| MYC2        | c46426_g2         | GGCGTCGTCATCTGCTTCAA      | CCATCTCCCCACCCTAACAC      |
| DXS         | c49476_g1         | TGCGGGCTACTTGGATTTCG      | GAACCACTAATCATTCACGAGC    |
| ISPH        | c44729_g5         | TTACCTGCTTTCGGTGCTGC      | CGGTTGCCACTGTCTCCTCA      |
| HMGR        | c50260_g1         | TGTCTTCTTCACCGTATTCTTCTCG | CCGAAGAACCCGAGAAGGTAGAT   |
| FPS         | c48867_g1         | CCTTCGAGTTCGATGACGATTC    | TCCGCCTTTAAGCAACTGGTAG    |
| IDI         | c43940_g2         | CTCTTCCTTCGCTGGTCTTACTCTC | CCCAACGACATTGTCATTTTCATCC |
| GGPS        | c42408_g1         | CGGTGACAACCTCCAGCAAGATACT | CCTTCAATCTCCTCGTGGCT      |
| REF/SRPP    | c41870_g1         | TAATGCCTCCTGCGGTGAAAGAC   | AGAGTTTTCCAAGCCGAAGAAGCGT |
